# Supplementary material
Source: PubMed Central journal article supplement (PMC6112858)
Supplement: NIHMS980251-supplement-1.pdf [file NIHMS980251-supplement-1.pdf]

**Supplementary Table 4.** Subgroup analyses based on self-reported prior HIV testing, number of sexual partners and daily income that compares HIV testing uptake in the novel incentive types to the gain-framed incentive using modified Poisson regression models with robust error variances.

|                                                      | <b>No testing<br/>in last 12<br/>months<sup>a</sup> RR<br/>(95% CI)</b> | <b>Tested in<br/>last 12<br/>months<sup>a</sup> RR<br/>(95% CI)</b> | <b>1 partner in<br/>last 12<br/>months<sup>b</sup> RR<br/>(95% CI)</b> | <b>&gt;1 partner<br/>in last 12<br/>months<sup>b</sup> RR<br/>(95% CI)</b> | <b>Daily<br/>income<br/>below<br/>median RR<br/>(95% CI)</b> | <b>Daily<br/>income<br/>above<br/>median RR<br/>(95% CI)</b> |
|------------------------------------------------------|-------------------------------------------------------------------------|---------------------------------------------------------------------|------------------------------------------------------------------------|----------------------------------------------------------------------------|--------------------------------------------------------------|--------------------------------------------------------------|
| <b>Observations</b>                                  | 1260                                                                    | 1161                                                                | 1779                                                                   | 389                                                                        | 1233                                                         | 1229                                                         |
| <b>Incentive type</b>                                |                                                                         |                                                                     |                                                                        |                                                                            |                                                              |                                                              |
| Gain-framed                                          | Ref.                                                                    | Ref.                                                                | Ref.                                                                   | Ref.                                                                       | Ref.                                                         | Ref.                                                         |
| Loss-framed                                          | 1.06 (0.94 -<br>1.19)                                                   | 1.03 (0.91 -<br>1.16)                                               | 1.06 (0.96 -<br>1.16)                                                  | 1.03 (0.83 -<br>1.29)                                                      | 1.06 (0.94 -<br>1.19)                                        | 1.04 (0.93 -<br>1.18)                                        |
| Lottery                                              | 1.15 (1.03 -<br>1.28)                                                   | 1.07 (0.95 -<br>1.20)                                               | 1.12 (1.02 -<br>1.22)                                                  | 1.14 (0.93 -<br>1.39)                                                      | 1.10 (0.98 -<br>1.23)                                        | 1.13 (1.01 -<br>1.27)                                        |
| <b>Incentive cost</b>                                |                                                                         |                                                                     |                                                                        |                                                                            |                                                              |                                                              |
| Low-cost                                             | Ref.                                                                    | Ref.                                                                | Ref.                                                                   | Ref.                                                                       | Ref.                                                         | Ref.                                                         |
| High-cost                                            | 1.05 (0.93 -<br>1.18)                                                   | 1.06 (0.94 -<br>1.19)                                               | 1.08 (0.99 -<br>1.19)                                                  | 1.05 (0.85 -<br>1.29)                                                      | 1.06 (0.95 -<br>1.19)                                        | 1.10 (0.99 -<br>1.24)                                        |
| <b>Interacted cost<br/>and type of<br/>incentive</b> |                                                                         |                                                                     |                                                                        |                                                                            |                                                              |                                                              |
| High-cost x Loss-<br>framed                          | 1.00 (0.85 -<br>1.17)                                                   | 0.98 (0.84 -<br>1.15)                                               | 0.95 (0.84 -<br>1.08)                                                  | 0.91 (0.66 -<br>1.24)                                                      | 1.00 (0.86 -<br>1.16)                                        | 0.92 (0.78 -<br>1.08)                                        |

|             |              |              |              |              |              |              |
|-------------|--------------|--------------|--------------|--------------|--------------|--------------|
| High-cost x | 0.95 (0.82 - | 0.89 (0.75 - | 0.90 (0.80 - | 0.83 (0.62 - | 0.98 (0.84 - | 0.82 (0.70 - |
| Lottery     | 1.11)        | 1.04)        | 1.02)        | 1.12)        | 1.14)        | 0.95)        |

---

\*None of the relative risks (RR) above had a p-value < 0.008.

aRR=adjusted relative risk. CI=Confidence Interval. Ref=Reference group.

<sup>a</sup>Model excludes participants who reported known HIV-positive status at enrollment.

<sup>b</sup>Model excludes participants who reported no sexual partners in the past 12 months.
